# Supplementary material
Source: HighWire-hosted journal article supplement (https://cmajopen.ca/highwire/filestream/81030/field_highwire_adjunct_files/0/open-2016-0123-original-submission.pdf)
Supplement: open-2016-0123-original-submission.pdf [file open-2016-0123-original-submission.pdf]

**Prevalence of distressing symptoms at the end of life in an acute care hospital**

|                               |                                                                                                                                                                                                                                                                                                                                                                                                                                                                                                                                                                                                                                                                                                                                                                                                                                                                                                                                                                                                                                                                                                                                                                                                                                                                                                                                                                                                                                                                  |
|-------------------------------|------------------------------------------------------------------------------------------------------------------------------------------------------------------------------------------------------------------------------------------------------------------------------------------------------------------------------------------------------------------------------------------------------------------------------------------------------------------------------------------------------------------------------------------------------------------------------------------------------------------------------------------------------------------------------------------------------------------------------------------------------------------------------------------------------------------------------------------------------------------------------------------------------------------------------------------------------------------------------------------------------------------------------------------------------------------------------------------------------------------------------------------------------------------------------------------------------------------------------------------------------------------------------------------------------------------------------------------------------------------------------------------------------------------------------------------------------------------|
| Journal:                      | <i>CMAJ</i>                                                                                                                                                                                                                                                                                                                                                                                                                                                                                                                                                                                                                                                                                                                                                                                                                                                                                                                                                                                                                                                                                                                                                                                                                                                                                                                                                                                                                                                      |
| Manuscript ID                 | CMAJ-16-0711                                                                                                                                                                                                                                                                                                                                                                                                                                                                                                                                                                                                                                                                                                                                                                                                                                                                                                                                                                                                                                                                                                                                                                                                                                                                                                                                                                                                                                                     |
| Manuscript Type:              | Research - Cohort study (retrospective)                                                                                                                                                                                                                                                                                                                                                                                                                                                                                                                                                                                                                                                                                                                                                                                                                                                                                                                                                                                                                                                                                                                                                                                                                                                                                                                                                                                                                          |
| Date Submitted by the Author: | 21-Jun-2016                                                                                                                                                                                                                                                                                                                                                                                                                                                                                                                                                                                                                                                                                                                                                                                                                                                                                                                                                                                                                                                                                                                                                                                                                                                                                                                                                                                                                                                      |
| Complete List of Authors:     | Kobewka, Daniel; University of Ottawa, Department of Medicine; Ottawa Hospital Research Institute<br>Ronksley, Paul; University of Calgary, Community Health Sciences<br>McIsaac, Daniel; Ottawa Hospital Research Institute; University of Ottawa, Department of Anesthesiology and Pain Medicine<br>Malpuru, Sunita; University of Ottawa, Department of Medicine; Ottawa Hospital Research Institute<br>Forster, Alan; University of Ottawa, Department of Medicine; Ottawa Hospital Research Institute; The Ottawa Hospital, Performance Measurement                                                                                                                                                                                                                                                                                                                                                                                                                                                                                                                                                                                                                                                                                                                                                                                                                                                                                                         |
| Keywords:                     | Palliative Medicine, Epidemiology, Pain, Quality of Life                                                                                                                                                                                                                                                                                                                                                                                                                                                                                                                                                                                                                                                                                                                                                                                                                                                                                                                                                                                                                                                                                                                                                                                                                                                                                                                                                                                                         |
| More Detailed Keywords:       | end-of-life, Symptom management, physician assisted death                                                                                                                                                                                                                                                                                                                                                                                                                                                                                                                                                                                                                                                                                                                                                                                                                                                                                                                                                                                                                                                                                                                                                                                                                                                                                                                                                                                                        |
| Abstract:                     | <p><b>Background</b><br/>There is currently debate over the benefits and harms of physician-assisted death. One of the factors influencing this debate is concern about distressing symptoms in the days prior to death. The objective of this study was to describe the frequency of symptoms prior to death and determine patient characteristics associated with these symptoms.</p> <p><b>Methods</b><br/>We reviewed the medical record of every patient who died at a multi-site academic teaching hospital over a 3-month period. We determined the number of episodes of pain, dyspnea, agitation and nausea during the final 48 hours of life and assessed the patient and encounter characteristics associated with 2 or more episodes of distressing symptoms.</p> <p><b>Results</b><br/>480 patients died during the study period. 29% (140/480) had 2 or more distressing symptoms in the final 48 hours of life. Higher Elixhauser comorbidity scores (RR 1.35, 95% CI 1.23 – 1.49), having a family doctor (RR 2.33, 95% CI 1.02 – 5.38), being admitted to the medical oncology service (RR 1.51, 95% CI 1.11 – 2.05), and having a documented order for no resuscitation written early in the hospitalization (RR 1.38, 95% CI 1.01 – 1.89) were independently associated with distressing symptoms. Admission to intensive care was associated with fewer distressing symptoms (RR 0.39, CI 95% 0.19 – 0.80).</p> <p><b>Interpretation</b></p> |

1  
2  
3  
4  
5  
6  
7  
8  
9  
10  
11  
12  
13  
14  
15  
16  
17  
18  
19  
20  
21  
22  
23  
24  
25  
26  
27  
28  
29  
30  
31  
32  
33  
34  
35  
36  
37  
38  
39  
40  
41  
42  
43  
44  
45  
46  
47  
48  
49  
50  
51  
52  
53  
54  
55  
56  
57  
58  
59  
60

|  |                                                                                                                                                                                                                                               |
|--|-----------------------------------------------------------------------------------------------------------------------------------------------------------------------------------------------------------------------------------------------|
|  | Distressing symptoms are common in the final 48 hours of life, especially in patients with multi-morbidity who want limitations on the aggressiveness of their care. An integrated palliative approach is needed for select at-risk patients. |
|  |                                                                                                                                                                                                                                               |

SCHOLARONE™  
Manuscripts

Confidential

# Prevalence of distressing symptoms at the end of life in an acute care hospital

Daniel Kobewka<sup>1,2</sup>, Paul Ronksley<sup>3</sup>, Dan McIsaac<sup>2,4</sup>, Sunita Mulpuru<sup>1,2</sup>, Alan Forster<sup>1,2,5</sup>

## Affiliations:

1. Department of Medicine – The Ottawa Hospital, University of Ottawa, Ottawa, Ontario, Canada.
2. Ottawa Hospital Research Institute, Ottawa, Ontario, Canada.
3. Department of Community Health Sciences, University of Calgary, Calgary, Alberta, Canada.
4. Department of Anesthesiology and Pain Medicine – The Ottawa Hospital, University of Ottawa, Ottawa, Ontario, Canada.
5. Performance Measurement, The Ottawa Hospital, Ottawa, Ontario, Canada.

## Corresponding Author:

Dr. Daniel M. Kobewka  
Departments of Medicine Division of General Internal Medicine  
Ottawa Hospital, Civic Campus  
1053 Carling Avenue  
Ottawa, ON K1Y 4E9  
E-mail: dkobewka@gmail.com

Manuscript Word Count: 2321 (excluding abstract, acknowledgements, references, and tables)

Abstract word count: 248

Running Title: Distressing symptoms at the end-of-life

Number of Tables: 2

Number of Figures: 1

Appendices: 0

**Abstract****Background**

There is currently debate over the benefits and harms of physician-assisted death. One of the factors influencing this debate is concern about distressing symptoms in the days prior to death. The objective of this study was to describe the frequency of symptoms prior to death and determine patient characteristics associated with these symptoms.

**Methods**

We reviewed the medical record of every patient who died at a multi-site academic teaching hospital over a 3-month period. We determined the number of episodes of pain, dyspnea, agitation and nausea during the final 48 hours of life and assessed the patient and encounter characteristics associated with 2 or more episodes of distressing symptoms.

**Results**

480 patients died during the study period. 29% (140/480) had 2 or more distressing symptoms in the final 48 hours of life. Higher Elixhauser comorbidity scores (RR 1.35, 95% CI 1.23 – 1.49), having a family doctor (RR 2.33, 95% CI 1.02 – 5.38), being admitted to the medical oncology service (RR 1.51, 95% CI 1.11 – 2.05), and having a documented order for no resuscitation written early in the hospitalization (RR 1.38, 95% CI 1.01 – 1.89) were independently associated with distressing symptoms. Admission to intensive care was associated with fewer distressing symptoms (RR 0.39, CI 95% 0.19 – 0.80).

**Interpretation**

1  
2  
3 Distressing symptoms are common in the final 48 hours of life, especially in patients  
4  
5  
6 with multi-morbidity who want limitations on the aggressiveness of their care. An  
7  
8  
9 integrated palliative approach is needed for select at-risk patients.  
10  
11  
12  
13  
14  
15  
16  
17  
18  
19  
20  
21  
22  
23  
24  
25  
26  
27  
28  
29  
30  
31  
32  
33  
34  
35  
36  
37  
38  
39  
40  
41  
42  
43  
44  
45  
46  
47  
48  
49  
50  
51  
52  
53  
54  
55  
56  
57  
58  
59  
60

Confidential

## Introduction

The care of terminally ill patients has become a significant issue facing providers and policy makers. Heightening this attention is the evolving perspectives on physician-assisted death by various patient advocacy groups and the general public. It is likely these views are driven in part by recognition that many patients experience distressing symptoms at the time of death. Avoiding distressing symptoms is very important to patients at the end of life and is likely a primary motivation for physician assisted death<sup>1-3</sup>.

Our knowledge of terminal patients' experiences is limited. In Canada, as in many other developing countries, the majority of deaths occur in acute care hospitals<sup>4,5</sup>. This may not be the most appropriate location to provide end-of-life care<sup>6</sup>; but it does create an opportunity to evaluate symptoms in a large proportion of dying patients. Prior research is dated or has focused on disease specific cohorts<sup>7-11</sup>. These prior studies, while limited in focus, do suggest that a significant proportion of patients have poor symptom control at the time of death<sup>12-14</sup>.

We performed this study to describe the epidemiology of distressing symptoms prior to death for patients in a multi-site academic health sciences center. This information will guide better service delivery by instructing providers on the extent of any potential care gap between patient desires and outcomes. More importantly, it will help define target populations to maximize the impact of any interventions, such as enhanced palliative care services and physician assisted death.

## Methods

### *Study Design and Population*

We conducted this study at The Ottawa Hospital - an academic health sciences center with three campuses, 1065 beds, and a catchment area of approximately 1 million people. We included all adult inpatients that died in hospital between September 5<sup>th</sup> and December 16<sup>th</sup> 2013. We excluded people who died in the emergency department prior to admission.

### *Data Sources*

Data was extracted from two main sources, the Ottawa Hospital Data Warehouse (OHDW), and from direct review of the patient's medical record by a clinician. The OHDW is a relational database that contains clinical and administrative information for each patient hospitalized and treated at The Ottawa Hospital.

### *Study Variables*

Using a standardized chart extraction form, a clinician reviewed the medical record from the final hospitalization of each patient. The form was initially piloted on 10 charts, prior to use on the full cohort. Information on patient decision-making about resuscitation was collected in order to understand the wishes of people with more symptoms at the end of life. In addition, early documentation of patient preferences is a quality indicator for end of life care<sup>15,16</sup>. The variables extracted from the patient's medical record included: the patient's wishes for cardiopulmonary resuscitation (CPR) and mechanical ventilation as documented in the first 24 hours of admission, any order

1  
2  
3 to withhold CPR and mechanical ventilation written before the time of death, the  
4  
5 number of days prior to death the resuscitation orders were written, whether family  
6  
7 was present at any point in the final 24 hours of life, and symptoms of pain, dyspnea,  
8  
9 agitation or nausea occurring in the final 48 hours of life.  
10  
11

12  
13 Using the OHDW we extracted information regarding patient demographics,  
14  
15 previous inpatient encounters, total length of hospital stay prior to death, whether the  
16  
17 patient had a family physician, hospital service on admission and at the time of death,  
18  
19 Elixhauser comorbidity score, and baseline risk of death at time of admission. The  
20  
21 Elixhauser comorbidity score uses 30 different conditions identified through  
22  
23 administrative data to create a score that summarizes disease burden and is correlated  
24  
25 with the risk of in-hospital mortality<sup>17,18</sup>. The estimated baseline risk of death in  
26  
27 hospital was calculated using a validated risk score that uses laboratory test values,  
28  
29 patient demographics, and comorbidities<sup>19</sup>.  
30  
31  
32  
33  
34  
35  
36  
37  
38

### 39 *Outcomes*

40  
41 The primary outcome was the incidence of distressing symptoms during the final  
42  
43 48 hours of life, as documented in the patient chart. We defined distressing symptoms  
44  
45 as pain ( $\geq 5/10$ ) on a scale anchored at 0 – no pain and 10 – worst possible pain<sup>20</sup>,  
46  
47 dyspnea, nausea, or agitation. These symptoms were selected because they are  
48  
49 common at the end of life and cause significant distress for many patients<sup>1,21</sup>. We used  
50  
51 a threshold of 5 or more out of 10 for pain scores in order to capture pain that was likely  
52  
53 causing distress and not simply a nuisance. During the study period our hospital had an  
54  
55  
56  
57  
58  
59  
60



1  
2  
3 hourly rounding policy that required nurses to assess each patient every hour. There  
4  
5 was however no standardized treatment pathway to deal with distressing symptoms.  
6  
7  
8  
9

### 10 *Analysis*

11  
12 We described the frequency of each distressing symptom in the final 48 hours of  
13  
14 life. We used means ( $\pm$  standard deviation), medians (inter-quartile range), and  
15  
16 proportions as appropriate to describe the characteristics of patients who died during  
17  
18 the study period. We compared characteristics of patients who had 2 or more episodes  
19  
20 of distressing symptoms in the final 48 hours of life versus to those who had less than 2  
21  
22 episodes of distressing symptoms in the final 48 hours of life. Chi-squared test or 2-  
23  
24 sample t-test was used as appropriate for the bivariate analysis.  
25  
26  
27  
28  
29

30  
31 We developed multivariable log binomial regression models to identify patient  
32  
33 and hospitalization characteristics associated with the presence of distressing symptoms  
34  
35 in the final 48 hours of life. We chose log binomial regression because of the intuitive  
36  
37 interpretation of relative risks and the divergence of odds ratios and relative risks when  
38  
39 an outcome is common<sup>22,23</sup>. A stepwise model building approach was selected using  
40  
41 relative risks (RR) with corresponding 95% confidence intervals (CI) as the common  
42  
43 measure of association. All patient and hospitalization characteristics that had p-values  
44  
45  $\leq 0.10$  in the bivariate analysis were used for multivariate analysis. Specifically, we  
46  
47 tested patient characteristics (age, sex, Elixhauser comorbidity score at admission  
48  
49 (modeled as a continuous variable), and presence of a family physician), hospital  
50  
51 admission characteristics (admitting service, number of prior admissions in past 6  
52  
53  
54  
55  
56  
57  
58  
59  
60

1  
2  
3 months, and involvement of a palliative care physician), and patient wishes regarding  
4  
5 resuscitation and mechanical ventilation at time of admission. Variables that had a  
6  
7 potential for reverse causation given their timing related to the outcome of interest  
8  
9 were not included in multivariate analysis. This included patient's wishes for  
10  
11 resuscitation recorded at the time of death and presence of family during the final 24  
12  
13 hours of life. We then used backwards elimination techniques (with an alpha level of  
14  
15 0.05) to develop reduced models. All analyses were completed using SAS 9.3 statistical  
16  
17 software (SAS Institute Inc., Cary, NC). This study was approved by the Ottawa Health  
18  
19 Science Network Research Ethics Board.  
20  
21  
22  
23  
24

25  
26 To further describe patients who died with distressing symptoms we selected  
27  
28 several representative cases to describe in narrative format. These cases were  
29  
30 pseudonymised to maintain confidentiality.  
31  
32  
33  
34  
35

## 36 Results

37  
38 During the study period there were 14,266 patients admitted, the mean age (SD)  
39  
40 was 48.9 years (27.3 years), 56.5% were female and the median length of stay (IQR) was  
41  
42 3 days (2-7 days). There were 480 deaths during the study period (3.4% mortality rate).  
43  
44 The mean age (SD) of the decedents was 73.7 years (16.1 years), 47.5% were female,  
45  
46 and median length of stay (IQR) was 7 days (3-17 days). The medical record of one  
47  
48 patient could not be located and was therefore excluded from further analysis.  
49  
50  
51  
52

53  
54 Among the 479 patients who died and had complete records, 207 (43.2%) had at  
55  
56 least one distressing symptom documented in the final 48 hours of life, while 140  
57  
58  
59  
60

1  
2  
3 (29.2%) had at least two. Pain and dyspnea were the most common symptoms while  
4  
5  
6 nausea was the least common (**Table 1**).  
7

8  
9 Table 2 contains the characteristics of patients with 2 or more episodes of  
10  
11 distressing symptoms in the final 48 hours of life compared to those with less than 2  
12  
13 episodes. Patients with 2 or more episodes of distressing symptoms in the final 48  
14  
15 hours of life had significantly more inpatient encounters in the last 6 months, more  
16  
17 inpatient days in the last year, longer length of stay, and higher Elixhauser comorbidity  
18  
19 scores compared to patients who had less than 2 distressing symptoms (**Table 2**).  
20  
21  
22

23  
24 Patients with 2 or more episodes of distressing symptoms were also more likely  
25  
26 to have a family physician, more likely to be admitted to an oncology service and less  
27  
28 likely to be admitted to the intensive care unit (ICU). Interestingly, patients with 2 or  
29  
30 more episodes of distressing symptoms were more likely to have a documented wish for  
31  
32 no resuscitation and no ICU admission within 24 hours of admission (47.1% versus  
33  
34 34.4%  $p=0.01$ ), compared to those with less than 2 distressing symptoms. Patients with  
35  
36 distressing symptoms prior to death were more likely to have a no resuscitation order  
37  
38 documented in the chart at the time of death (90.7% versus 71.1%), were less likely to  
39  
40 have this order written within 24 hours of death (12.9% versus 23.9%) and were more  
41  
42 likely to be seen by a palliative care physician prior to death (45.0% versus 23.8%). It is  
43  
44 notable that there were no differences in age or the predicted risk of death on  
45  
46 admission for patients with or without distressing symptoms prior to death.  
47  
48  
49  
50  
51  
52

53  
54  
55 Within our fully adjusted multivariable regression model, we found that higher  
56  
57 Elixhauser score (RR 1.35, 95% CI 1.23 – 1.49), having a family doctor (RR 2.33, 95% CI  
58  
59  
60

1  
2  
3 1.02 – 5.38), being admitted to medical oncology (RR 1.51, 95% CI 1.11 – 2.05) and  
4  
5 having a documented wish for no CPR and no intubation during the first 24 hours in  
6  
7 hospital (RR 1.38, 95% CI 1.01 – 1.89) were all associated with distressing symptoms at  
8  
9 the end of life. Being admitted to intensive care was associated with fewer distressing  
10  
11 symptoms at the end of life (RR 0.39, 95% CI 0.19 – 0.80) (**Figure 2**). **Box 1** contains 3  
12  
13 representative case vignettes of patients who died with more than 2 episodes of  
14  
15 distressing symptoms.  
16  
17  
18  
19  
20

## 21 **Discussion**

22  
23 We found that almost 1 in 3 people who died in hospital had two or more  
24  
25 episodes of distressing symptoms in the final 48 hours of life. People with distressing  
26  
27 symptoms prior to death had higher comorbidity burden, were more likely to have a  
28  
29 family doctor, more likely to be admitted to medical oncology and more likely to have  
30  
31 an order for no resuscitation written in the chart within 24 hours of admission.  
32  
33  
34  
35  
36

37 Consistent with previous research we found that many patients experience  
38  
39 distressing symptoms prior to death<sup>21,24,25</sup>. While some patients may choose less  
40  
41 aggressive treatment of symptoms in favor of being more lucid, patients need to be  
42  
43 counseled about the frequency and severity of symptoms at the end of life so they can  
44  
45 make educated choices. Patients consistently state that freedom from distressing  
46  
47 symptoms is one of the most important elements of quality end-of-life care<sup>1,3</sup>. This is in  
48  
49 contrast to the reality that many patients do experience distressing symptoms at the  
50  
51 end of life. If patients knew they were likely to experience distressing symptoms at the  
52  
53  
54  
55  
56  
57  
58  
59  
60

1  
2  
3 end of life some may choose more aggressive symptomatic treatment or physician  
4  
5 assisted death.  
6  
7

8  
9 In our study comorbidity burden had the strongest association with symptoms  
10  
11 prior to death. This finding is likely because patients with multiple comorbidities  
12  
13 experience more symptoms at all times, not just in the days prior to death<sup>13,26,27</sup>. As  
14  
15 other research has suggested, care for multimorbid patients is often inappropriately  
16  
17 focused on disease modifying treatments instead of a palliative approach that prioritizes  
18  
19 treatment of symptoms along with disease modifying treatments<sup>28-31</sup>. Further  
20  
21 reinforcing the importance of a palliative approach, we found that patients with more  
22  
23 symptoms at the end of life wanted limitations on the aggressiveness of care they  
24  
25 received. Part of the challenge in implementing a palliative approach to care is the  
26  
27 perception that palliative care is only for those who have predictably terminal illnesses  
28  
29 such as incurable cancer<sup>32,33</sup>. For patients with chronic progressive diseases with  
30  
31 frequent exacerbations, a recovery from the current episode is often possible; therefore  
32  
33 focusing on prolonging life may seem appropriate. This is in contrast to the World  
34  
35 Health Organization's model for palliative care that recommends therapy to alleviate  
36  
37 suffering be initiated early in the disease course along with disease modifying therapy<sup>34</sup>.  
38  
39  
40  
41  
42  
43  
44  
45

46 We found several other interesting associations. Patients who were admitted to  
47  
48 medical oncology had more symptoms prior to death than those admitted to other  
49  
50 specialties. This finding differs from prior studies showing that there is no difference in  
51  
52 the symptom burden of patients who die from cancer versus non-cancer causes<sup>8,14,35</sup>.  
53  
54  
55 This is likely because only very symptomatic oncology patients are admitted for end of  
56  
57  
58  
59  
60

1  
2  
3 life care while those with fewer symptoms remain at home. Lastly we found that  
4  
5 patients admitted to the intensive care unit experience fewer symptoms prior to death.  
6  
7  
8 This likely occurred because they are usually sedated and therefore unable to report  
9  
10 symptoms. Also the one-to-one nursing ratio likely facilitates rapid assessment and  
11  
12 treatment of any symptoms.  
13  
14  
15

### 16 17 18 *Strengths and Limitations* 19

20  
21 We performed this study in a multi-facility hospital that provides a significant  
22  
23 proportion of the acute care health services in a large Canadian urban center. This  
24  
25 suggests the study is generalizable. Although our chart assessments were retrospective,  
26  
27 significant effort at the Ottawa Hospital has been made to standardize hourly nursing  
28  
29 assessments and documentation. This may mitigate some concerns over our primary  
30  
31 outcome assessment. We believe that if anything our outcome ascertainment method  
32  
33 will underestimate the prevalence of distressing symptoms as staff will not document  
34  
35 symptoms that are not present but may, at times, miss symptoms.  
36  
37  
38  
39  
40  
41  
42

### 43 44 *Conclusions* 45

46  
47 In a group of unselected patients who died in hospital, almost 1 in 3 experienced  
48  
49 distressing symptoms in the last 48 hours of life. The high incidence of distressing  
50  
51 symptoms in highly comorbid patients, who have asked for less aggressive care,  
52  
53 suggests that further work is needed to integrate a palliative approach into chronic  
54  
55 disease care. Future work should seek to understand symptoms experienced at the end  
56  
57  
58  
59  
60

1  
2  
3 of life by people who receive ideal care. Knowledge translation work is needed to  
4  
5  
6 determine how accurate expectations about end of life symptoms influence patient's  
7  
8  
9 decisions about palliative care and physician-assisted death.  
10  
11  
12  
13  
14  
15  
16  
17  
18  
19  
20  
21  
22  
23  
24  
25  
26  
27  
28  
29  
30  
31  
32  
33  
34  
35  
36  
37  
38  
39  
40  
41  
42  
43  
44  
45  
46  
47  
48  
49  
50  
51  
52  
53  
54  
55  
56  
57  
58  
59  
60

Confidential

1  
2  
3 **Acknowledgments**  
4

5  
6 This research was supported by Ministry of Research, Innovation and Science,  
7  
8 and The Ottawa Hospital Academic Medical Organization.  
9

10  
11  
12  
13 **Author Contributions**  
14

15  
16 DK and AF conceived of the study, performed data collection, analysis and wrote the  
17  
18 manuscript. PR DM and SM contributed to analysis and interpretation of results. They  
19  
20 critically revised the manuscript and gave final approval of the manuscript for  
21  
22 publication.  
23  
24

25  
26  
27  
28 **Conflicts of Interest**  
29

30  
31 None  
32  
33  
34  
35  
36  
37  
38  
39  
40  
41  
42  
43  
44  
45  
46  
47  
48  
49  
50  
51  
52  
53  
54  
55  
56  
57  
58  
59  
60



## References

1. Heyland DK, Dodek P, Rocker G, et al. What matters most in end-of-life care: perceptions of seriously ill patients and their family members. *CMAJ : Canadian Medical Association journal = journal de l'Association medicale canadienne*. 2006;174:627-33.
2. Singer PA, Martin DK, Kelner M. Quality end-of-life care: patients' perspectives. *Jama*. 1999;281:163-8.
3. Steinhauer KE, Christakis NA, Clipp EC, McNeilly M, McIntyre L, Tulsky JA. Factors considered important at the end of life by patients, family, physicians, and other care providers. *Jama*. 2000;284:2476-82.
4. *Health Care Use at the End of Life in Western Canada*. Ottawa ON: Canadian Institute for Health Information;2007.
5. *Health Care Use at the End of Life in Atlantic Canada*. Ottawa, ON: Canadian Institute for Health Information;2011.
6. Higginson IJ, Sen-Gupta GJ. Place of care in advanced cancer: a qualitative systematic literature review of patient preferences. *Journal of palliative medicine*. 2000;3:287-300.
7. Langford DJ, Tripathy D, Paul SM, et al. Trajectories of pain and analgesics in oncology outpatients with metastatic bone pain. *The journal of pain : official journal of the American Pain Society*. 2011;12:495-507.
8. Solano JP, Gomes B, Higginson IJ. A comparison of symptom prevalence in far advanced cancer, AIDS, heart disease, chronic obstructive pulmonary disease and renal disease. *Journal of pain and symptom management*. 2006;31:58-69.
9. McCarthy EP, Phillips RS, Zhong Z, Drews RE, Lynn J. Dying with cancer: patients' function, symptoms, and care preferences as death approaches. *Journal of the American Geriatrics Society*. 2000;48:S110-21.
10. Mercadante S, Casuccio A, Fulfaro F. The course of symptom frequency and intensity in advanced cancer patients followed at home. *Journal of pain and symptom management*. 2000;20:104-12.
11. Nordgren L, Sorensen S. Symptoms experienced in the last six months of life in patients with end-stage heart failure. *European journal of cardiovascular nursing : journal of the Working Group on Cardiovascular Nursing of the European Society of Cardiology*. 2003;2:213-7.
12. Ellershaw J, Smith C, Overill S, Walker SE, Aldridge J. Care of the dying: setting standards for symptom control in the last 48 hours of life. *Journal of pain and symptom management*. 2001;21:12-7.
13. Janssen DJ, Spruit MA, Wouters EF, Schols JM. Daily symptom burden in end-stage chronic organ failure: a systematic review. *Palliative medicine*. 2008;22:938-48.
14. Tranmer JE, Heyland D, Dudgeon D, Groll D, Squires-Graham M, Coulson K. Measuring the symptom experience of seriously ill cancer and noncancer hospitalized patients near the end of life with the memorial symptom assessment scale. *Journal of pain and symptom management*. 2003;25:420-9.

- 1
  - 2
  - 3
  - 4
  - 5
  - 6
  - 7
  - 8
  - 9
  - 10
  - 11
  - 12
  - 13
  - 14
  - 15
  - 16
  - 17
  - 18
  - 19
  - 20
  - 21
  - 22
  - 23
  - 24
  - 25
  - 26
  - 27
  - 28
  - 29
  - 30
  - 31
  - 32
  - 33
  - 34
  - 35
  - 36
  - 37
  - 38
  - 39
  - 40
  - 41
  - 42
  - 43
  - 44
  - 45
  - 46
  - 47
  - 48
  - 49
  - 50
  - 51
  - 52
  - 53
  - 54
  - 55
  - 56
  - 57
  - 58
  - 59
  - 60
15. Detering KM, Hancock AD, Reade MC, Silvester W. The impact of advance care planning on end of life care in elderly patients: randomised controlled trial. *BMJ (Clinical research ed.)*. 2010;340:c1345.
16. Sinuff T, Dodek P, You JJ, et al. Improving End-of-Life Communication and Decision Making: The Development of a Conceptual Framework and Quality Indicators. *Journal of pain and symptom management*. 2015;49:1070-80.
17. Elixhauser A, Steiner C, Harris DR, Coffey RM. Comorbidity measures for use with administrative data. *Medical care*. 1998;36:8-27.
18. van Walraven C, Austin PC, Jennings A, Quan H, Forster AJ. A modification of the Elixhauser comorbidity measures into a point system for hospital death using administrative data. *Medical care*. 2009;47:626-33.
19. Escobar GJ, Greene JD, Scheirer P, Gardner MN, Draper D, Kipnis P. Risk-adjusting hospital inpatient mortality using automated inpatient, outpatient, and laboratory databases. *Medical care*. 2008;46:232-9.
20. McCaffery M, Pasero C. *Pain: Clinical Manual*. St Louis: Mosby Inc; 1999.
21. Kehl KA, Kowalkowski JA. A systematic review of the prevalence of signs of impending death and symptoms in the last 2 weeks of life. *The American journal of hospice & palliative care*. 2013;30:601-16.
22. McNutt LA, Wu C, Xue X, Hafner JP. Estimating the relative risk in cohort studies and clinical trials of common outcomes. *American journal of epidemiology*. 2003;157:940-3.
23. Spiegelman D, Hertzmark E. Easy SAS calculations for risk or prevalence ratios and differences. *American journal of epidemiology*. 2005;162:199-200.
24. Levin ML, Berry JI, Leiter J. Management of pain in terminally ill patients: physician reports of knowledge, attitudes, and behavior. *Journal of pain and symptom management*. 1998;15:27-40.
25. A controlled trial to improve care for seriously ill hospitalized patients. The study to understand prognoses and preferences for outcomes and risks of treatments (SUPPORT). The SUPPORT Principal Investigators. *Jama*. 1995;274:1591-8.
26. Currow DC, Clark K, Kamal A, et al. The Population Burden of Chronic Symptoms that Substantially Predate the Diagnosis of a Life-Limiting Illness. *Journal of palliative medicine*. 2015;18:480-5.
27. Rodriguez KL, Hanlon JT, Perera S, Jaffe EJ, Sevick MA. A cross-sectional analysis of the prevalence of undertreatment of nonpain symptoms and factors associated with undertreatment in older nursing home hospice/palliative care patients. *The American journal of geriatric pharmacotherapy*. 2010;8:225-32.
28. Fitzsimons D, Mullan D, Wilson JS, et al. The challenge of patients' unmet palliative care needs in the final stages of chronic illness. *Palliative medicine*. 2007;21:313-22.
29. Gore JM, Brophy CJ, Greenstone MA. How well do we care for patients with end stage chronic obstructive pulmonary disease (COPD)? A comparison of palliative care and quality of life in COPD and lung cancer. *Thorax*. 2000;55:1000-6.

- 1  
2  
3  
4  
5  
6  
7  
8  
9  
10  
11  
12  
13  
14  
15  
16  
17  
18  
19  
20  
21  
22  
23  
24  
25  
26  
27  
28  
29  
30  
31  
32  
33  
34  
35  
36  
37  
38  
39  
40  
41  
42  
43  
44  
45  
46  
47  
48  
49  
50  
51  
52  
53  
54  
55  
56  
57  
58  
59  
60
30. Cleary J, Drennan J. Quality of life of patients on haemodialysis for end-stage renal disease. *Journal of advanced nursing*. 2005;51:577-86.
  31. Gibbs JS, McCoy AS, Gibbs LM, Rogers AE, Addington-Hall JM. Living with and dying from heart failure: the role of palliative care. *Heart (British Cardiac Society)*. 2002;88 Suppl 2:ii36-9.
  32. Bruera E. The development of a palliative care culture. *Journal of palliative care*. 2004;20:316-9.
  33. Hanks G. Palliative care: careless use of language undermines our identity. *Palliative medicine*. 2008;22:109-10.
  34. WHO. National Cancer Control Programmes - Policies and Managerial Guidelines. 2nd ed. Geneva : WHO; 2002.
  35. Saini T, Murtagh FE, Dupont PJ, McKinnon PM, Hatfield P, Saunders Y. Comparative pilot study of symptoms and quality of life in cancer patients and patients with end stage renal disease. *Palliative medicine*. 2006;20:631-6.

1  
2  
3  
4  
5  
6  
7  
8  
9  
10  
11  
12  
13  
14  
15  
16  
17  
18  
19  
20  
21  
22  
23  
24  
25  
26  
27  
28  
29  
30  
31  
32  
33  
34  
35  
36  
37  
38  
39  
40  
41  
42  
43  
44  
45  
46  
47  
48  
49  
50  
51  
52  
53  
54  
55  
56  
57  
58  
59  
60

**Figure 1.** Patient and Encounter level characteristics associated with presence of 2 or more distressing symptoms in the last 48 hours of life

\*For patient’s wishes for resuscitation as documented in the chart 24 hours after admission, the reference category was “not documented”.

Confidential

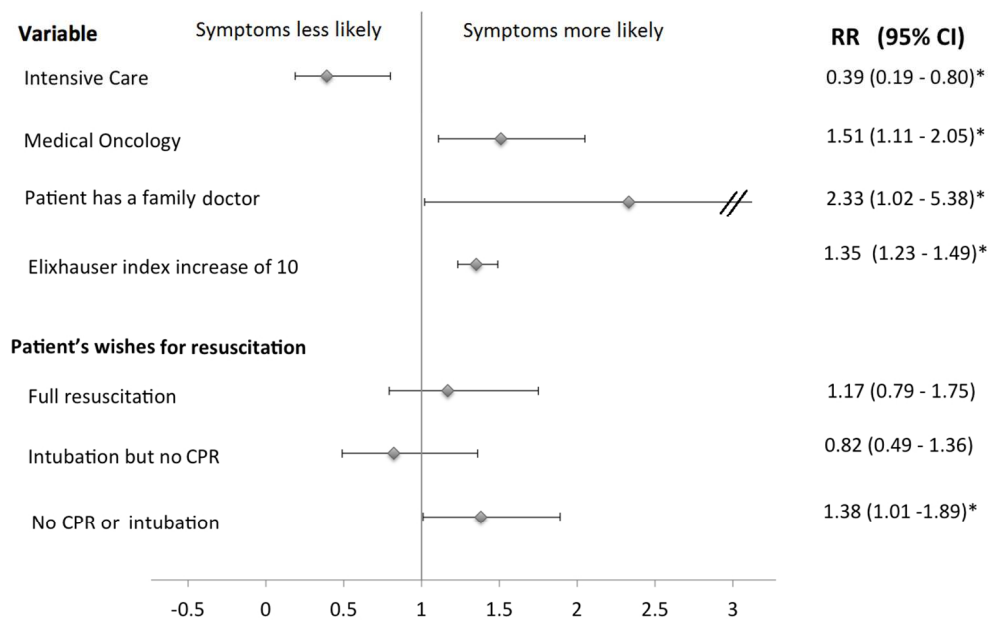

Figure 1. Patient and Encounter level characteristics associated with presence of 2 or more distressing symptoms in the last 48 hours of life

\*For patient's wishes for resuscitation as documented in the chart 24 hours after admission, the reference category was "not documented".

**Table 1:** Distressing symptoms documented in the medical record during the final 48 hours of life, N=479

| Frequency of symptom | Number of patients with each symptom N=479 (%) |            |            |            | TOTAL Symptoms |
|----------------------|------------------------------------------------|------------|------------|------------|----------------|
|                      | Pain                                           | Dyspnea    | Agitation  | Nausea     |                |
| 0                    | 376 (78.5)                                     | 373 (77.9) | 402 (83.9) | 459 (95.8) | 272 (56.8)     |
| 1                    | 49 (10.2)                                      | 54 (11.3)  | 45 (9.4)   | 12 (2.5)   | 67 (14.0)      |
| 2                    | 27 (5.6)                                       | 32 (6.7)   | 14 (2.9)   | 6 (2.5)    | 45 (9.4)       |
| 3                    | 15 (3.1)                                       | 13 (2.7)   | 10 (2.1)   | 1 (1.3)    | 44 (9.2)       |
| 4                    | 8 (1.7)                                        | 4 (0.8)    | 5 (1.0)    | 0 (0)      | 18 (3.8)       |
| ≥ 5                  | 4 (0.8)                                        | 3 (0.6)    | 3 (0.6)    | 1 (0.6)    | 33 (6.9)       |

**Table 2:** Characteristics of patients with and with out 2 or more documented episodes of distressing symptoms in the final 48 hours of life.

|                                                     | <b>≥ 2 episodes of distressing symptoms prior to death n=140 (29.2%)</b> | <b>&lt; 2 episodes of distressing symptoms 48 hours prior to death n=339 (70.8%)</b> | <b>p-value</b> |
|-----------------------------------------------------|--------------------------------------------------------------------------|--------------------------------------------------------------------------------------|----------------|
| Mean age (±SD)                                      | 74.8 (13.4)                                                              | 73.6 (17.1)                                                                          | P=0.40         |
| Gender - Female                                     | 76 (54.3)                                                                | 155 (45.6)                                                                           | P=0.09         |
| <b>Hospital Service at time of death (top 10)</b>   |                                                                          |                                                                                      |                |
| Intensive Care                                      | 15 (10.7)                                                                | 111 (32.7)                                                                           | P<0.001        |
| General Medicine                                    | 49 (35.0)                                                                | 87 (25.6)                                                                            | P=0.05         |
| Cardiology                                          | 9 (6.4)                                                                  | 33 (6.9)                                                                             | P=0.29         |
| Oncology                                            | 22 (15.7)                                                                | 14 (4.1)                                                                             | P<0.001        |
| Neurology                                           | 2 (1.4)                                                                  | 12 (3.5)                                                                             | P=0.37         |
| Malignant hematology                                | 6 (4.3)                                                                  | 6 (1.8)                                                                              | P=0.12         |
| General Surgery                                     | 5 (3.6)                                                                  | 7 (2.1)                                                                              | P=0.35         |
| Radiation Oncology                                  | 7 (5.0)                                                                  | 5 (1.5)                                                                              | P=0.15         |
| Family Medicine                                     | 2 (1.4)                                                                  | 8 (2.4)                                                                              | P=0.73         |
| Gynecologic Oncology                                | 5 (3.6)                                                                  | 4 (1.2)                                                                              | P=0.13         |
| Number of inpatient encounters in the last 6 months |                                                                          |                                                                                      |                |
| 0                                                   | 76 (54.3)                                                                | 231 (67.9)                                                                           | P=0.005        |
| 1                                                   | 36 (25.7)                                                                | 63 (18.5)                                                                            | P=0.08         |
| 2                                                   | 15 (10.7)                                                                | 24 (7.1)                                                                             | P=0.20         |
| 3                                                   | 5 (3.6)                                                                  | 17 (5.0)                                                                             | P=0.63         |
| ≥ 4                                                 | 8 (5.7)                                                                  | 5 (1.5)                                                                              | P=0.007        |
| In-Patient days in the last year                    | 14.4 (27.1)                                                              | 10.1 (24.1)                                                                          | P=0.09         |
| Patient has a family physician                      | 135 (96.4)                                                               | 299 (87.9)                                                                           | P = 0.04       |
| Median Total LOS (IQR)                              | 17.6 (31.6)                                                              | 13.2 (19.8)                                                                          | P=0.05         |
| Predicted Mortality                                 | 0.29 (0.19)                                                              | 0.31 (0.20)                                                                          | P=0.31         |
| Elixhauser comorbidity score (SD)                   | 15.5 (9.3)                                                               | 11.2(8.5)                                                                            | P<0.001        |
| Q1 -3 - 5                                           | 27 (19.3)                                                                | 103 (30.5)                                                                           |                |
| Q2 6 -12                                            | 25 (17.9)                                                                | 100 (29.6)                                                                           |                |
| Q3 12 - 19                                          | 39 (27.9)                                                                | 83 (24.6)                                                                            |                |
| Q4 19 - 48                                          | 49 (35.0)                                                                | 52 (15.4)                                                                            |                |
| <b>Patient wishes for resuscitation documented</b>  |                                                                          |                                                                                      |                |

1  
2  
3  
4  
5  
6  
7  
8  
9  
10  
11  
12  
13  
14  
15  
16  
17  
18  
19  
20  
21  
22  
23  
24  
25  
26  
27  
28  
29  
30  
31  
32  
33  
34  
35  
36  
37  
38  
39  
40  
41  
42  
43  
44  
45  
46  
47  
48  
49  
50  
51  
52  
53  
54  
55  
56  
57  
58  
59  
60

|                                                                          |            |            |         |
|--------------------------------------------------------------------------|------------|------------|---------|
| <b>within 24 hours of admission</b>                                      |            |            |         |
| Not documented                                                           | 36 (25.7)  | 100 (29.7) | P=0.44  |
| Full resuscitation including CPR                                         | 27 (19.3)  | 71 (20.9)  | P=0.71  |
| Resuscitation but no CPR                                                 | 11 (7.9)   | 51 (15.0)  | P=0.04  |
| No resuscitation                                                         | 66 (47.1)  | 117 (34.4) | P=0.01  |
| Family Present in the last 24 hours of life                              | 106 (75.7) | 272 (80.0) | P=0.27  |
| Patient wishes for no resuscitation documented in chart at time of death | 127 (90.7) | 241 (71.1) | P<0.001 |
| Patient wishes for no resuscitation documented ≤ 24 hours before death   | 18 (12.9)  | 81 (23.9)  | P<0.001 |
| Palliative Care consulted                                                | 63 (45.0)  | 81 (23.8)  | P <0.05 |

\*Abbreviations: CPR: Cardiopulmonary Resuscitation; SD: Standard Deviation



**Box 1:** Representative cases of patients who experienced multiple episodes of distressing symptoms in the final 48 hours of life.

| Symptom |   |   |   | Case description                                                                                                                                                                                                                                                                                                                                                                                                                                                                                                                                                                                                                                      |
|---------|---|---|---|-------------------------------------------------------------------------------------------------------------------------------------------------------------------------------------------------------------------------------------------------------------------------------------------------------------------------------------------------------------------------------------------------------------------------------------------------------------------------------------------------------------------------------------------------------------------------------------------------------------------------------------------------------|
| P       | D | A | N |                                                                                                                                                                                                                                                                                                                                                                                                                                                                                                                                                                                                                                                       |
| a       | y | g | a |                                                                                                                                                                                                                                                                                                                                                                                                                                                                                                                                                                                                                                                       |
| i       | s | i | u |                                                                                                                                                                                                                                                                                                                                                                                                                                                                                                                                                                                                                                                       |
| n       | p | t | s |                                                                                                                                                                                                                                                                                                                                                                                                                                                                                                                                                                                                                                                       |
|         | n | a | e |                                                                                                                                                                                                                                                                                                                                                                                                                                                                                                                                                                                                                                                       |
|         | e | t | a |                                                                                                                                                                                                                                                                                                                                                                                                                                                                                                                                                                                                                                                       |
|         | a | i |   |                                                                                                                                                                                                                                                                                                                                                                                                                                                                                                                                                                                                                                                       |
|         |   | o |   |                                                                                                                                                                                                                                                                                                                                                                                                                                                                                                                                                                                                                                                       |
|         |   | n |   |                                                                                                                                                                                                                                                                                                                                                                                                                                                                                                                                                                                                                                                       |
| 4       | 0 | 0 | 0 | 65 yo female with metastatic squamous cell carcinoma of the nasopharynx admitted because of dysphagia. The patient received a percutaneous endoscopic gastrostomy tube for feeding. They experienced worsening episodic chest pain and dyspnea that worsened over the next 5 weeks that was treated with narcotics as needed and then continuous narcotics. The chart documents that the patient appeared in distress on numerous occasions but because of a language barrier it was difficult to know what symptoms they were experiencing. The patient died after a period of agitation and apparent distress that was treated with more narcotics. |
| 2       | 5 | 0 | 0 | 84 year old male with metastatic renal cell carcinoma was admitted with delirium secondary to hypercalcemia. He was treated with intravenous fluids. The patient began experiencing flank pain and dyspnea. Initially every recorded episode was treated with narcotics but the following assessment documents that the patient is still complaining of pain. The patient was getting frustrated with the poor pain control. The patient had increasing dyspnea that was treated with benzodiazepines. He died after 3 hours of increasing dyspnea.                                                                                                   |
| 3       | 0 | 4 | 0 | 62 year old female with metastatic esophageal cancer presented to hospital with diabetic ketoacidosis (DKA), acute kidney injury and malignant ascites. The DKA was treated and the kidney injury resolved. The patient was waiting to go to hospice but developed worsening abdominal pain and severe agitation that was treated with phenobarbital. The phenobarbital was titrated up until the patient was obtunded but calm. The patient passed away shortly after.                                                                                                                                                                               |

## STROBE Statement—checklist of items that should be included in reports of observational studies

|                              | Item No | Recommendation                                                                                                                                                                                                                                                                                                                                                                                                                                                                                                                                                                                                                                                                                   |                                  |
|------------------------------|---------|--------------------------------------------------------------------------------------------------------------------------------------------------------------------------------------------------------------------------------------------------------------------------------------------------------------------------------------------------------------------------------------------------------------------------------------------------------------------------------------------------------------------------------------------------------------------------------------------------------------------------------------------------------------------------------------------------|----------------------------------|
| <b>Title and abstract</b>    | 1       | (a) Indicate the study's design with a commonly used term in the title or the abstract<br>(b) Provide in the abstract an informative and balanced summary of what was done and what was found                                                                                                                                                                                                                                                                                                                                                                                                                                                                                                    | ✓<br>✓                           |
| <b>Introduction</b>          |         |                                                                                                                                                                                                                                                                                                                                                                                                                                                                                                                                                                                                                                                                                                  |                                  |
| Background/rationale         | 2       | Explain the scientific background and rationale for the investigation being reported                                                                                                                                                                                                                                                                                                                                                                                                                                                                                                                                                                                                             | ✓                                |
| Objectives                   | 3       | State specific objectives, including any prespecified hypotheses                                                                                                                                                                                                                                                                                                                                                                                                                                                                                                                                                                                                                                 | ✓                                |
| <b>Methods</b>               |         |                                                                                                                                                                                                                                                                                                                                                                                                                                                                                                                                                                                                                                                                                                  |                                  |
| Study design                 | 4       | Present key elements of study design early in the paper                                                                                                                                                                                                                                                                                                                                                                                                                                                                                                                                                                                                                                          | ✓                                |
| Setting                      | 5       | Describe the setting, locations, and relevant dates, including periods of recruitment, exposure, follow-up, and data collection                                                                                                                                                                                                                                                                                                                                                                                                                                                                                                                                                                  | ✓                                |
| Participants                 | 6       | (a) <i>Cohort study</i> —Give the eligibility criteria, and the sources and methods of selection of participants. Describe methods of follow-up<br><i>Case-control study</i> —Give the eligibility criteria, and the sources and methods of case ascertainment and control selection. Give the rationale for the choice of cases and controls<br><i>Cross-sectional study</i> —Give the eligibility criteria, and the sources and methods of selection of participants<br>(b) <i>Cohort study</i> —For matched studies, give matching criteria and number of exposed and unexposed<br><i>Case-control study</i> —For matched studies, give matching criteria and the number of controls per case | ✓                                |
| Variables                    | 7       | Clearly define all outcomes, exposures, predictors, potential confounders, and effect modifiers. Give diagnostic criteria, if applicable                                                                                                                                                                                                                                                                                                                                                                                                                                                                                                                                                         | ✓                                |
| Data sources/<br>measurement | 8*      | For each variable of interest, give sources of data and details of methods of assessment (measurement). Describe comparability of assessment methods if there is more than one group                                                                                                                                                                                                                                                                                                                                                                                                                                                                                                             | ✓                                |
| Bias                         | 9       | Describe any efforts to address potential sources of bias                                                                                                                                                                                                                                                                                                                                                                                                                                                                                                                                                                                                                                        | ✓                                |
| Study size                   | 10      | Explain how the study size was arrived at                                                                                                                                                                                                                                                                                                                                                                                                                                                                                                                                                                                                                                                        | ✓                                |
| Quantitative variables       | 11      | Explain how quantitative variables were handled in the analyses. If applicable, describe which groupings were chosen and why                                                                                                                                                                                                                                                                                                                                                                                                                                                                                                                                                                     | ✓                                |
| Statistical methods          | 12      | (a) Describe all statistical methods, including those used to control for confounding<br>(b) Describe any methods used to examine subgroups and interactions<br>(c) Explain how missing data were addressed<br>(d) <i>Cohort study</i> —If applicable, explain how loss to follow-up was addressed<br><i>Case-control study</i> —If applicable, explain how matching of cases and controls was addressed<br><i>Cross-sectional study</i> —If applicable, describe analytical methods taking account of sampling strategy<br>(e) Describe any sensitivity analyses                                                                                                                                | ✓<br>✓<br>✓<br>N/A<br>N/A<br>N/A |

Continued on next page

N/A

**Results**

|                  |     |                                                                                                                                                                                                                                                                                                                                                                                                               |             |
|------------------|-----|---------------------------------------------------------------------------------------------------------------------------------------------------------------------------------------------------------------------------------------------------------------------------------------------------------------------------------------------------------------------------------------------------------------|-------------|
| Participants     | 13* | (a) Report numbers of individuals at each stage of study—eg numbers potentially eligible, examined for eligibility, confirmed eligible, included in the study, completing follow-up, and analysed<br>(b) Give reasons for non-participation at each stage<br>(c) Consider use of a flow diagram                                                                                                               | ✓           |
| Descriptive data | 14* | (a) Give characteristics of study participants (eg demographic, clinical, social) and information on exposures and potential confounders<br>(b) Indicate number of participants with missing data for each variable of interest<br>(c) <i>Cohort study</i> —Summarise follow-up time (eg, average and total amount)                                                                                           | ✓<br>✓<br>✓ |
| Outcome data     | 15* | <i>Cohort study</i> —Report numbers of outcome events or summary measures over time<br><i>Case-control study</i> —Report numbers in each exposure category, or summary measures of exposure<br><i>Cross-sectional study</i> —Report numbers of outcome events or summary measures                                                                                                                             | ✓           |
| Main results     | 16  | (a) Give unadjusted estimates and, if applicable, confounder-adjusted estimates and their precision (eg, 95% confidence interval). Make clear which confounders were adjusted for and why they were included<br>(b) Report category boundaries when continuous variables were categorized<br>(c) If relevant, consider translating estimates of relative risk into absolute risk for a meaningful time period | ✓           |
| Other analyses   | 17  | Report other analyses done—eg analyses of subgroups and interactions, and sensitivity analyses                                                                                                                                                                                                                                                                                                                | N/A         |

**Discussion**

|                  |    |                                                                                                                                                                            |   |
|------------------|----|----------------------------------------------------------------------------------------------------------------------------------------------------------------------------|---|
| Key results      | 18 | Summarise key results with reference to study objectives                                                                                                                   | ✓ |
| Limitations      | 19 | Discuss limitations of the study, taking into account sources of potential bias or imprecision. Discuss both direction and magnitude of any potential bias                 | ✓ |
| Interpretation   | 20 | Give a cautious overall interpretation of results considering objectives, limitations, multiplicity of analyses, results from similar studies, and other relevant evidence | ✓ |
| Generalisability | 21 | Discuss the generalisability (external validity) of the study results                                                                                                      | ✓ |

**Other information**

|         |    |                                                                                                                                                               |   |
|---------|----|---------------------------------------------------------------------------------------------------------------------------------------------------------------|---|
| Funding | 22 | Give the source of funding and the role of the funders for the present study and, if applicable, for the original study on which the present article is based | ✓ |
|---------|----|---------------------------------------------------------------------------------------------------------------------------------------------------------------|---|

\*Give information separately for cases and controls in case-control studies and, if applicable, for exposed and unexposed groups in cohort and cross-sectional studies.

**Note:** An Explanation and Elaboration article discusses each checklist item and gives methodological background and published examples of transparent reporting. The STROBE checklist is best used in conjunction with this article (freely available on the Web sites of PLoS Medicine at <http://www.plosmedicine.org/>, Annals of Internal Medicine at <http://www.annals.org/>, and Epidemiology at <http://www.epidem.com/>). Information on the STROBE Initiative is available at [www.strobe-statement.org](http://www.strobe-statement.org).

O. J. A.  
D. KOBELKA
